# Supplementary material for: Cecal microbiome profile altered by Salmonella enterica, serovar Enteritidis inoculation in chicken
Source: Springer Nature journal article supplement (doi:10.1186/s13099-018-0261-x), 2018-08-03

# PCA

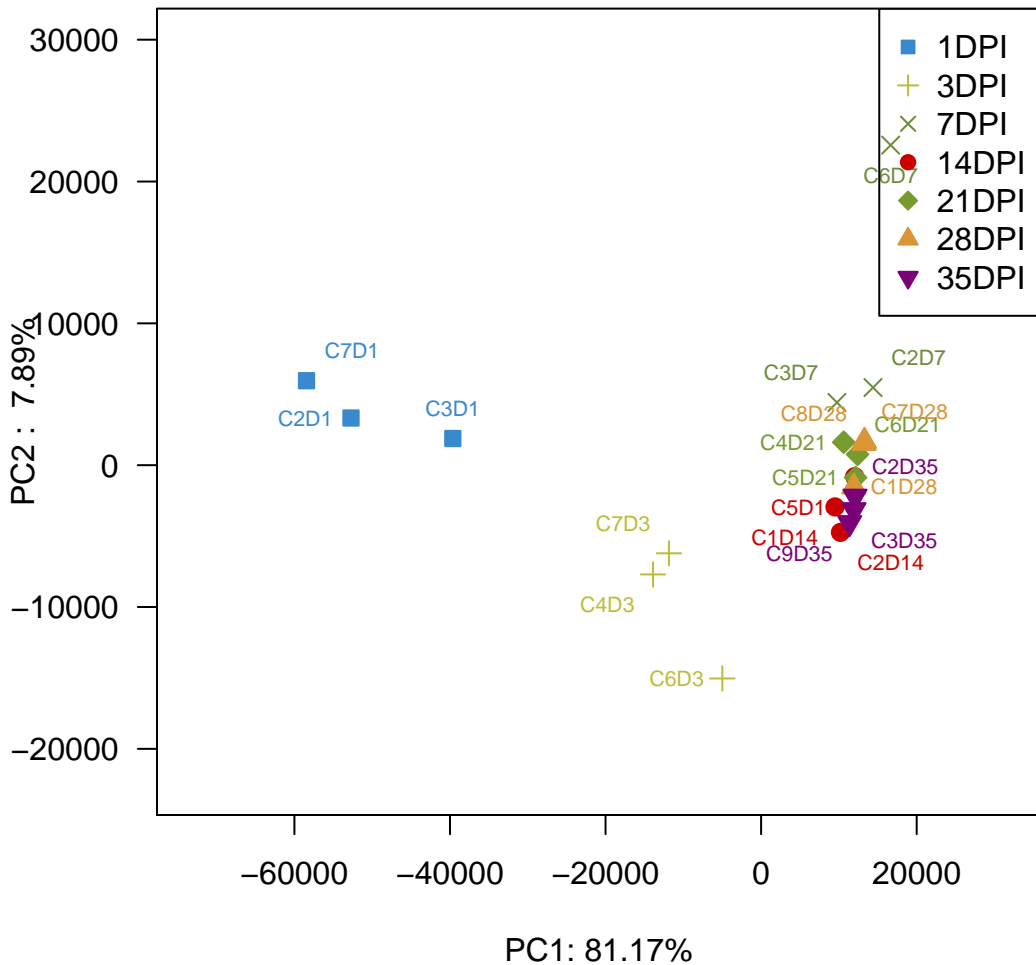

Supplement: MOESM2 [file 16000464]
